# Supplementary material
Source: PubMed Central journal article supplement (PMC5970995)
Supplement: NIHMS960991-supplement-Authorship_change_form.pdf [file NIHMS960991-supplement-Authorship_change_form.pdf]

## Change of Authorship Form

---

**(Must be completed and signed by ALL authors)**

Please check all that apply

New author(s) have been added (in addition to this form, all new authors must complete the copyright transfer agreement and conflict of interest disclosure.

Change in order of authorship.

An author wishes to remove his/her name. An author's name may only be removed his/her own request and a letter signed by the author should accompany this form

**Manuscript Number** STROKE/2017/018637

**Manuscript Title** Role of myeloid lineage cell autophagy in ischemic brain injury

### Former Authorship

Please list ALL AUTHORS in the same order as the original submission. For more than 12, use an extra sheet.

#### Print Name

Name (1) Masakazu Kotoda  
Name (2) Hajime Furukawa  
Name (3) Takeshi Miyamoto  
Name (4) Masaaki Korai  
Name (5) Fumiaki Shikata  
Name (6) Atsushi Kuwabara

#### Print Name

Name (7) Xiaoxing Xiong  
Name (8) Rona G. Giffard  
Name (9) Tomoki Hashimoto  
Name (10) \_\_\_\_\_  
Name (11) \_\_\_\_\_  
Name (12) \_\_\_\_\_

### New Authorship

All authors must sign below agreeing to the changes in authorship. The authorship order must reflect the authorship order of the manuscript.

|                                   |                           |            |
|-----------------------------------|---------------------------|------------|
| Name (1) <u>Masakazu Kotoda</u>   | Signature _____           | Date _____ |
| Name (2) <u>Hajime Furukawa</u>   | Signature <u>Furukawa</u> | Date _____ |
| Name (3) <u>Takeshi Miyamoto</u>  | Signature _____           | Date _____ |
| Name (4) <u>Masaaki Korai</u>     | Signature _____           | Date _____ |
| Name (5) <u>Fumiaki Shikata</u>   | Signature _____           | Date _____ |
| Name (6) <u>Atsushi Kuwabara</u>  | Signature _____           | Date _____ |
| Name (7) <u>Xiaoxing Xiong</u>    | Signature _____           | Date _____ |
| Name (8) <u>Caleb Rutledge</u>    | Signature _____           | Date _____ |
| Name (9) <u>Rona G. Giffard</u>   | Signature _____           | Date _____ |
| Name (10) <u>Tomoki Hashimoto</u> | Signature _____           | Date _____ |
| Name (11) _____                   | Signature _____           | Date _____ |
| Name (12) _____                   | Signature _____           | Date _____ |

**Please scan and email to [stroke@strokeahajournal.org](mailto:stroke@strokeahajournal.org).**

# Change of Authorship Form

(Must be completed and signed by ALL authors)

Please check all that apply

New author(s) have been added (in addition to this form, all new authors must complete the copyright transfer agreement and conflict of interest disclosure.

Change in order of authorship.

An author wishes to remove his/her name. An author's name may only be removed his/her own request and a letter signed by the author should accompany this form

Manuscript Number STROKE/2017/018637

Manuscript Title Role of myeloid lineage cell autophagy in ischemic brain injury

## Former Authorship

Please list ALL AUTHORS in the same order as the original submission. For more than 12, use an extra sheet.

### Print Name

Name (1) Masakazu Kotoda  
Name (2) Hajime Furukawa  
Name (3) Takeshi Miyamoto  
Name (4) Masaaki Korai  
Name (5) Fumiaki Shikata  
Name (6) Atsushi Kuwabara

### Print Name

Name (7) Xiaoxing Xiong  
Name (8) Rona G. Giffard  
Name (9) Tomoki Hashimoto  
Name (10) \_\_\_\_\_  
Name (11) \_\_\_\_\_  
Name (12) \_\_\_\_\_

## New Authorship

All authors must sign below agreeing to the changes in authorship. The authorship order must reflect the authorship order of the manuscript.

|                                   |                 |                    |
|-----------------------------------|-----------------|--------------------|
| Name (1) <u>Masakazu Kotoda</u>   | Signature _____ | Date _____         |
| Name (2) <u>Hajime Furukawa</u>   | Signature _____ | Date _____         |
| Name (3) <u>Takeshi Miyamoto</u>  | Signature _____ | Date _____         |
| Name (4) <u>Masaaki Korai</u>     | Signature _____ | Date _____         |
| Name (5) <u>Fumiaki Shikata</u>   | Signature _____ | Date _____         |
| Name (6) <u>Atsushi Kuwabara</u>  | Signature _____ | Date _____         |
| Name (7) <u>Xiaoxing Xiong</u>    | Signature _____ | Date _____         |
| Name (8) <u>Caleb Rutledge</u>    | Signature _____ | Date <u>4/3/18</u> |
| Name (9) <u>Rona G. Giffard</u>   | Signature _____ | Date _____         |
| Name (10) <u>Tomoki Hashimoto</u> | Signature _____ | Date _____         |
| Name (11) _____                   | Signature _____ | Date _____         |
| Name (12) _____                   | Signature _____ | Date _____         |

## Change of Authorship Form

(Must be completed and signed by ALL authors)

Please check all that apply

New author(s) have been added (in addition to this form, all new authors must complete the copyright transfer agreement and conflict of interest disclosure.

Change in order of authorship.

An author wishes to remove his/her name. An author's name may only be removed his/her own request and a letter signed by the author should accompany this form

Manuscript Number STROKE/2017/018637

Manuscript Title Role of myeloid lineage cell autophagy in ischemic brain injury

### Former Authorship

Please list ALL AUTHORS in the same order as the original submission. For more than 12, use an extra sheet.

#### Print Name

Name (1) Masakazu Kotoda  
Name (2) Hajime Furukawa  
Name (3) Takeshi Miyamoto  
Name (4) Masaaki Korai  
Name (5) Fumiaki Shikata  
Name (6) Atsushi Kuwabara

#### Print Name

Name (7) Xiaoxing Xiong  
Name (8) Rona G. Giffard  
Name (9) Tomoki Hashimoto  
Name (10) \_\_\_\_\_  
Name (11) \_\_\_\_\_  
Name (12) \_\_\_\_\_

### New Authorship

All authors must sign below agreeing to the changes in authorship. The authorship order must reflect the authorship order of the manuscript.

|                                   |                              |                      |
|-----------------------------------|------------------------------|----------------------|
| Name (1) <u>Masakazu Kotoda</u>   | Signature _____              | Date _____           |
| Name (2) <u>Hajime Furukawa</u>   | Signature _____              | Date _____           |
| Name (3) <u>Takeshi Miyamoto</u>  | Signature _____              | Date _____           |
| Name (4) <u>Masaaki Korai</u>     | Signature _____              | Date _____           |
| Name (5) <u>Fumiaki Shikata</u>   | Signature <u>[Signature]</u> | Date <u>4/4/2018</u> |
| Name (6) <u>Atsushi Kuwabara</u>  | Signature _____              | Date _____           |
| Name (7) <u>Xiaoxing Xiong</u>    | Signature _____              | Date _____           |
| Name (8) <u>Caleb Rutledge</u>    | Signature _____              | Date _____           |
| Name (9) <u>Rona G. Giffard</u>   | Signature _____              | Date _____           |
| Name (10) <u>Tomoki Hashimoto</u> | Signature <u>[Signature]</u> | Date <u>4/4/2018</u> |
| Name (11) _____                   | Signature _____              | Date _____           |
| Name (12) _____                   | Signature _____              | Date _____           |

Please scan and email to [stroke@strokeahajournal.org](mailto:stroke@strokeahajournal.org).

## Change of Authorship Form

(Must be completed and signed by ALL authors)

Please check all that apply

New author(s) have been added (in addition to this form, all new authors must complete the copyright transfer agreement and conflict of interest disclosure.

Change in order of authorship.

An author wishes to remove his/her name. An author's name may only be removed his/her own request and a letter signed by the author should accompany this form

Manuscript Number STROKE/2017/018637

Manuscript Title Role of myeloid lineage cell autophagy in ischemic brain injury

### Former Authorship

Please list ALL AUTHORS in the same order as the original submission. For more than 12, use an extra sheet.

#### Print Name

Name (1) Masakazu Kotoda  
Name (2) Hajime Furukawa  
Name (3) Takeshi Miyamoto  
Name (4) Masaaki Korai  
Name (5) Fumiaki Shikata  
Name (6) Atsushi Kuwabara

#### Print Name

Name (7) Xiaoxing Xiong  
Name (8) Rona G. Giffard  
Name (9) Tomoki Hashimoto  
Name (10) \_\_\_\_\_  
Name (11) \_\_\_\_\_  
Name (12) \_\_\_\_\_

### New Authorship

All authors must sign below agreeing to the changes in authorship. The authorship order must reflect the authorship order of the manuscript.

|                                   |                                  |                             |
|-----------------------------------|----------------------------------|-----------------------------|
| Name (1) <u>Masakazu Kotoda</u>   | Signature <u>Masakazu Kotoda</u> | Date <u>April 5th, 2018</u> |
| Name (2) <u>Hajime Furukawa</u>   | Signature _____                  | Date _____                  |
| Name (3) <u>Takeshi Miyamoto</u>  | Signature _____                  | Date _____                  |
| Name (4) <u>Masaaki Korai</u>     | Signature _____                  | Date _____                  |
| Name (5) <u>Fumiaki Shikata</u>   | Signature _____                  | Date _____                  |
| Name (6) <u>Atsushi Kuwabara</u>  | Signature _____                  | Date _____                  |
| Name (7) <u>Xiaoxing Xiong</u>    | Signature _____                  | Date _____                  |
| Name (8) <u>Caleb Rutledge</u>    | Signature _____                  | Date _____                  |
| Name (9) <u>Rona G. Giffard</u>   | Signature _____                  | Date _____                  |
| Name (10) <u>Tomoki Hashimoto</u> | Signature _____                  | Date _____                  |
| Name (11) _____                   | Signature _____                  | Date _____                  |
| Name (12) _____                   | Signature _____                  | Date _____                  |

Please scan and email to [stroke@strokeahajournal.org](mailto:stroke@strokeahajournal.org).

## Change of Authorship Form

(Must be completed and signed by ALL authors)

Please check all that apply

New author(s) have been added (in addition to this form, all new authors must complete the copyright transfer agreement and conflict of interest disclosure.

Change in order of authorship.

An author wishes to remove his/her name. An author's name may only be removed his/her own request and a letter signed by the author should accompany this form

Manuscript Number STROKE/2017/018637

Manuscript Title Role of myeloid lineage cell autophagy in ischemic brain injury

### Former Authorship

Please list ALL AUTHORS in the same order as the original submission. For more than 12, use an extra sheet.

#### Print Name

Name (1) Masakazu Kotoda  
Name (2) Hajime Furukawa  
Name (3) Takeshi Miyamoto  
Name (4) Masaaki Korai  
Name (5) Fumiaki Shikata  
Name (6) Atsushi Kuwabara

#### Print Name

Name (7) Xiaoxing Xiong  
Name (8) Rona G. Giffard  
Name (9) Tomoki Hashimoto  
Name (10) \_\_\_\_\_  
Name (11) \_\_\_\_\_  
Name (12) \_\_\_\_\_

### New Authorship

All authors must sign below agreeing to the changes in authorship. The authorship order must reflect the authorship order of the manuscript.

|                                   |                                 |                     |
|-----------------------------------|---------------------------------|---------------------|
| Name (1) <u>Masakazu Kotoda</u>   | Signature _____                 | Date _____          |
| Name (2) <u>Hajime Furukawa</u>   | Signature _____                 | Date _____          |
| Name (3) <u>Takeshi Miyamoto</u>  | Signature _____                 | Date _____          |
| Name (4) <u>Masaaki Korai</u>     | Signature _____                 | Date _____          |
| Name (5) <u>Fumiaki Shikata</u>   | Signature _____                 | Date _____          |
| Name (6) <u>Atsushi Kuwabara</u>  | Signature _____                 | Date _____          |
| Name (7) <u>Xiaoxing Xiong</u>    | Signature _____                 | Date _____          |
| Name (8) <u>Caleb Rutledge</u>    | Signature <u>Caleb Rutledge</u> | Date <u>4/15/18</u> |
| Name (9) <u>Rona G. Giffard</u>   | Signature _____                 | Date _____          |
| Name (10) <u>Tomoki Hashimoto</u> | Signature _____                 | Date _____          |
| Name (11) _____                   | Signature _____                 | Date _____          |
| Name (12) _____                   | Signature _____                 | Date _____          |

Please scan and email to [stroke@strokeahjournal.org](mailto:stroke@strokeahjournal.org).

## Change of Authorship Form

(Must be completed and signed by ALL authors)

Please check all that apply

New author(s) have been added (in addition to this form, all new authors must complete the copyright transfer agreement and conflict of interest disclosure.

Change in order of authorship.

An author wishes to remove his/her name. An author's name may only be removed his/her own request and a letter signed by the author should accompany this form

Manuscript Number STROKE/2017/018637

Manuscript Title Role of myeloid lineage cell autophagy in ischemic brain injury

### Former Authorship

Please list ALL AUTHORS in the same order as the original submission. For more than 12, use an extra sheet.

#### Print Name

Name (1) Masakazu Kotoda  
 Name (2) Hajime Furukawa  
 Name (3) Takeshi Miyamoto  
 Name (4) Masaaki Korai  
 Name (5) Fumiaki Shikata  
 Name (6) Atsushi Kuwabara

#### Print Name

Name (7) Xiaoxing Xiong  
 Name (8) Rona G. Giffard  
 Name (9) Tomoki Hashimoto  
 Name (10) \_\_\_\_\_  
 Name (11) \_\_\_\_\_  
 Name (12) \_\_\_\_\_

### New Authorship

All authors must sign below agreeing to the changes in authorship. The authorship order must reflect the authorship order of the manuscript.

|                                   |                                |                    |
|-----------------------------------|--------------------------------|--------------------|
| Name (1) <u>Masakazu Kotoda</u>   | Signature _____                | Date _____         |
| Name (2) <u>Hajime Furukawa</u>   | Signature _____                | Date _____         |
| Name (3) <u>Takeshi Miyamoto</u>  | Signature _____                | Date _____         |
| Name (4) <u>Masaaki Korai</u>     | Signature <u>Masaaki Korai</u> | Date <u>4/5/18</u> |
| Name (5) <u>Fumiaki Shikata</u>   | Signature _____                | Date _____         |
| Name (6) <u>Atsushi Kuwabara</u>  | Signature _____                | Date _____         |
| Name (7) <u>Xiaoxing Xiong</u>    | Signature _____                | Date _____         |
| Name (8) <u>Caleb Rutledge</u>    | Signature _____                | Date _____         |
| Name (9) <u>Rona G. Giffard</u>   | Signature _____                | Date _____         |
| Name (10) <u>Tomoki Hashimoto</u> | Signature _____                | Date _____         |
| Name (11) _____                   | Signature _____                | Date _____         |
| Name (12) _____                   | Signature _____                | Date _____         |

Please scan and email to [stroke@strokeahajournal.org](mailto:stroke@strokeahajournal.org).

## Change of Authorship Form

(Must be completed and signed by ALL authors)

Please check all that apply

New author(s) have been added (in addition to this form, all new authors must complete the copyright transfer agreement and conflict of interest disclosure.

Change in order of authorship.

An author wishes to remove his/her name. An author's name may only be removed his/her own request and a letter signed by the author should accompany this form

Manuscript Number STROKE/2017/018637

Manuscript Title Role of myeloid lineage cell autophagy in ischemic brain injury

### Former Authorship

Please list ALL AUTHORS in the same order as the original submission. For more than 12, use an extra sheet.

#### Print Name

Name (1) Masakazu Kotoda  
Name (2) Hajime Furukawa  
Name (3) Takeshi Miyamoto  
Name (4) Masaaki Korai  
Name (5) Fumiaki Shikata  
Name (6) Atsushi Kuwabara

#### Print Name

Name (7) Xiaoxing Xiong  
Name (8) Rona G. Giffard  
Name (9) Tomoki Hashimoto  
Name (10) \_\_\_\_\_  
Name (11) \_\_\_\_\_  
Name (12) \_\_\_\_\_

### New Authorship

All authors must sign below agreeing to the changes in authorship. The authorship order must reflect the authorship order of the manuscript.

|                                   |                              |                       |
|-----------------------------------|------------------------------|-----------------------|
| Name (1) <u>Masakazu Kotoda</u>   | Signature _____              | Date _____            |
| Name (2) <u>Hajime Furukawa</u>   | Signature _____              | Date _____            |
| Name (3) <u>Takeshi Miyamoto</u>  | Signature _____              | Date _____            |
| Name (4) <u>Masaaki Korai</u>     | Signature _____              | Date _____            |
| Name (5) <u>Fumiaki Shikata</u>   | Signature _____              | Date _____            |
| Name (6) <u>Atsushi Kuwabara</u>  | Signature <u>A. Kuwabara</u> | Date <u>4/19/2018</u> |
| Name (7) <u>Xiaoxing Xiong</u>    | Signature _____              | Date _____            |
| Name (8) <u>Caleb Rutledge</u>    | Signature _____              | Date _____            |
| Name (9) <u>Rona G. Giffard</u>   | Signature _____              | Date _____            |
| Name (10) <u>Tomoki Hashimoto</u> | Signature _____              | Date _____            |
| Name (11) _____                   | Signature _____              | Date _____            |
| Name (12) _____                   | Signature _____              | Date _____            |

Please scan and email to [stroke@strokeahajournal.org](mailto:stroke@strokeahajournal.org).

## Change of Authorship Form

(Must be completed and signed by ALL authors)

Please check all that apply

New author(s) have been added (in addition to this form, all new authors must complete the copyright transfer agreement and conflict of interest disclosure.

Change in order of authorship.

An author wishes to remove his/her name. An author's name may only be removed his/her own request and a letter signed by the author should accompany this form

Manuscript Number STROKE/2017/018637

Manuscript Title Role of myeloid lineage cell autophagy in ischemic brain injury

### Former Authorship

Please list ALL AUTHORS in the same order as the original submission. For more than 12, use an extra sheet.

#### Print Name

Name (1) Masakazu Kotoda  
Name (2) Hajime Furukawa  
Name (3) Takeshi Miyamoto  
Name (4) Masaaki Korai  
Name (5) Fumiaki Shikata  
Name (6) Atsushi Kuwabara

#### Print Name

Name (7) Xiaoxing Xiong  
Name (8) Rona G. Giffard  
Name (9) Tomoki Hashimoto  
Name (10) \_\_\_\_\_  
Name (11) \_\_\_\_\_  
Name (12) \_\_\_\_\_

### New Authorship

All authors must sign below agreeing to the changes in authorship. The authorship order must reflect the authorship order of the manuscript.

|                                   |                                   |                      |
|-----------------------------------|-----------------------------------|----------------------|
| Name (1) <u>Masakazu Kotoda</u>   | Signature _____                   | Date _____           |
| Name (2) <u>Hajime Furukawa</u>   | Signature _____                   | Date _____           |
| Name (3) <u>Takeshi Miyamoto</u>  | Signature <u>Takeshi Miyamoto</u> | Date <u>4/3/2018</u> |
| Name (4) <u>Masaaki Korai</u>     | Signature _____                   | Date _____           |
| Name (5) <u>Fumiaki Shikata</u>   | Signature _____                   | Date _____           |
| Name (6) <u>Atsushi Kuwabara</u>  | Signature _____                   | Date _____           |
| Name (7) <u>Xiaoxing Xiong</u>    | Signature _____                   | Date _____           |
| Name (8) <u>Caleb Rutledge</u>    | Signature _____                   | Date _____           |
| Name (9) <u>Rona G. Giffard</u>   | Signature _____                   | Date _____           |
| Name (10) <u>Tomoki Hashimoto</u> | Signature _____                   | Date _____           |
| Name (11) _____                   | Signature _____                   | Date _____           |
| Name (12) _____                   | Signature _____                   | Date _____           |

Please scan and email to [stroke@strokeahajournal.org](mailto:stroke@strokeahajournal.org).



## Change of Authorship Form

(Must be completed and signed by ALL authors)

Please check all that apply

New author(s) have been added (in addition to this form, all new authors must complete the copyright transfer agreement and conflict of interest disclosure.

Change in order of authorship.

An author wishes to remove his/her name. An author's name may only be removed his/her own request and a letter signed by the author should accompany this form

Manuscript Number STROKE/2017/018637

Manuscript Title Role of myeloid lineage cell autophagy in ischemic brain injury

### Former Authorship

Please list ALL AUTHORS in the same order as the original submission. For more than 12, use an extra sheet.

#### Print Name

Name (1) Masakazu Kotoda  
Name (2) Hajime Furukawa  
Name (3) Takeshi Miyamoto  
Name (4) Masaaki Korai  
Name (5) Fumiaki Shikata  
Name (6) Atsushi Kuwabara

#### Print Name

Name (7) Xiaoxing Xiong  
Name (8) Rona G. Giffard  
Name (9) Tomoki Hashimoto  
Name (10) \_\_\_\_\_  
Name (11) \_\_\_\_\_  
Name (12) \_\_\_\_\_

### New Authorship

All authors must sign below agreeing to the changes in authorship. The authorship order must reflect the authorship order of the manuscript.

|                                   |                                 |                      |
|-----------------------------------|---------------------------------|----------------------|
| Name (1) <u>Masakazu Kotoda</u>   | Signature _____                 | Date _____           |
| Name (2) <u>Hajime Furukawa</u>   | Signature _____                 | Date _____           |
| Name (3) <u>Takeshi Miyamoto</u>  | Signature _____                 | Date _____           |
| Name (4) <u>Masaaki Korai</u>     | Signature _____                 | Date _____           |
| Name (5) <u>Fumiaki Shikata</u>   | Signature _____                 | Date _____           |
| Name (6) <u>Atsushi Kuwabara</u>  | Signature _____                 | Date _____           |
| Name (7) <u>Xiaoxing Xiong</u>    | Signature <u>Xiaoxing Xiong</u> | Date <u>4/4/2018</u> |
| Name (8) <u>Caleb Rutledge</u>    | Signature _____                 | Date _____           |
| Name (9) <u>Rona G. Giffard</u>   | Signature _____                 | Date _____           |
| Name (10) <u>Tomoki Hashimoto</u> | Signature _____                 | Date _____           |
| Name (11) _____                   | Signature _____                 | Date _____           |
| Name (12) _____                   | Signature _____                 | Date _____           |

Please scan and email to [stroke@strokeahajournal.org](mailto:stroke@strokeahajournal.org).
